1 **Changes in the medical admissions and mortality amongst children in four South African**  
2 **hospitals following the COVID -19 pandemic : A five-year review**

3

4 **Authors:**

5 Naidoo Kimesh Loganathan <sup>1,2</sup> Dorward Jienchi, <sup>3,4</sup>Chinniah Kogielambal, <sup>1,5</sup> Lawler Melissa,  
6 <sup>1,6</sup>Nattar Yugendhree, <sup>1,7</sup> Bottomley Christian , <sup>8</sup> Archary Moherndran <sup>1,2</sup>

7

8 <sup>1</sup> Department of Paediatrics and Child Health, School of Clinical Medicine, College of Health  
9 Sciences, University of KwaZulu-Natal, Durban, South Africa

10 <sup>2</sup> King Edward VIII Hospital, Congella, Durban, South Africa

11 <sup>3</sup> Nuffield Department of Primary Care Health Sciences, University of Oxford, Oxford, United  
12 Kingdom

13 <sup>4</sup> Centre for the AIDS Programme of Research in South Africa (CAPRISA), Durban, South  
14 Africa

15 <sup>5</sup> Mahatma Gandhi Memorial Hospital, Phoenix, Durban, South Africa

16 <sup>6</sup> Prince Mshyeni Memorial Hospital, uMlazi, Durban, South Africa

17 <sup>7</sup> RK Khan Memorial Hospital, Chatsworth, Durban, South Africa

18 <sup>8</sup> London School of Hygiene & Tropical Medicine, London, United Kingdom

19

20 Corresponding author:

21 Dr KL Naidoo

22 [Naidook9@ukzn.ac.za](mailto:Naidook9@ukzn.ac.za)

23 +27 31 260 4350

24

25

**NOTE: This preprint reports new research that has not been certified by peer review and should not be used to guide clinical practice.**

## 26 **ABSTRACT**

### 27 **Background**

28 Vulnerable children from poor communities with high HIV and Tuberculosis(TB) burdens  
29 were impacted by COVID-19 lockdowns. Concern was raised about the extent of this impact  
30 and anticipated post-pandemic surges in mortality.

### 31 **Methods**

32 Interrupted time series segmented regression analyses were done using routinely collected  
33 facility-level data of children admitted for medical conditions at four South African referral  
34 hospitals. Monthly admission and mortality data over a 60-month period from 01 April 2018  
35 to 31 January 2023 was analysed using models which included dummy lockdown level  
36 variables, a dummy post-COVID period variable, Fourier terms to account for seasonality, and  
37 excess mortality as a proxy for healthcare burden.

### 38 **Results**

39 Of the 45 015 admissions analysed, 1237(2.75%) demised with significant decreases in  
40 admissions during all the lockdown levels, with the most significant mean monthly decrease  
41 of 450(95%, CI=657.3, -244.3)  $p < 0.001$  in level 5 (the most severe) lockdown. There was  
42 evidence of loss of seasonality on a six-month scale during the COVID periods for all  
43 admissions ( $p = 0.002$ ), including under-one-year-olds ( $p = 0.034$ ) and under-five-year-olds  
44 ( $p = 0.004$ ). No decreases in mortality accompanied decreased admissions . Post-pandemic  
45 surges in admissions or mortality were not identified in children with acute gastroenteritis,  
46 acute pneumonia and severe acute malnutrition.

### 47 **Conclusion**

48 During the COVID-19 pandemic, paediatric admissions in 4 hospitals serving communities  
49 with high levels of HIV ,TB and poverty decreased similar to global experiences however there  
50 was no change in in-hospital mortality. No post-pandemic surge in admissions or mortality

51 were documented. Differences in the impact of pandemic control measures on transmission of  
52 childhood infections and access to health care may account for differing outcomes seen in our  
53 setting compared to the global experiences. Further studies are needed to understand the impact  
54 of pandemic control measures on healthcare provision and transmission dynamics and to better  
55 inform future responses amongst vulnerable child populations .

56

57 **Keywords:** Children; COVID-19, mortality, admissions

58

## 59 **Background**

60 The national lockdown regulations promulgated across the globe due to the COVID-19  
61 pandemic disrupted essential healthcare services for most populations [1]. Healthcare visits,  
62 including emergency outpatient visits and admissions, decreased sharply among children in all  
63 countries, especially between February 2020 and December 2021[2-5]. Decreases of 19%, 50%  
64 and 56% in paediatric admissions were documented in Cameroon, South Africa (SA) and  
65 across Europe, respectively, compared with pre-COVID-19 time periods [3-5]. Vulnerable  
66 populations, including children in lower- and middle-income countries (LMICs), were  
67 especially negatively impacted due to these lockdown measures [2-4].

68

69 The decrease in paediatric admissions documented has been more marked in children with  
70 communicable (77%) compared with non-communicable diseases (37%) [5]. Children with  
71 lower respiratory tract infections (LRTI), which includes those with highly communicable viral  
72 bronchiolitis, also decreased [6-8]. Changes in seasonal patterns of viral bronchiolitis when  
73 compared with patterns identified in previous pre-COVID-19 years were noted [6]. This  
74 was postulated to occur due to reduced person-to-person transmission, and it raised concerns

75 that a rebound would occur when transmission mitigating strategies and lockdown levels were  
76 curtailed [6].

77

78 Visits to children's preventative health services decreased significantly across multiple  
79 countries, especially after the start of the COVID-19 pandemic in February 2020 [9]. These  
80 decreases were documented in both urban and rural primary healthcare facilities.<sup>10</sup> Outpatient  
81 visits for children with Human Immunodeficiency Virus (HIV) dropped by 41%, and  
82 antiretroviral treatment initiation of newly diagnosed children also decreased in 2020 and  
83 2021[11]. These changes in access and utilisation of both preventative healthcare and HIV  
84 chronic care raised concerns for negative health consequences, especially where poverty, HIV  
85 and Tuberculosis (TB) is common and where many live in high density communities [11]. HIV  
86 viral suppression rates, however, were shown to be maintained among children, suggesting  
87 some chronic disease programmes remained reasonably robust over this period [12].

88

89 Overall, the COVID-19 pandemic disrupted healthcare provision and health-seeking behaviour  
90 and was postulated to disproportionately impact specific subpopulations in low-income  
91 countries with fragile health systems and pervasive social-structural vulnerabilities[13].  
92 Documentation of these indirect effects of the COVID-19 pandemic has been largely restricted  
93 to the period during the peaks of the COVID-19 lockdowns between February 2020 and  
94 December 2021 and not adequately documented in communities with high burdens of HIV,  
95 Tuberculosis (TB) and malnutrition [11]. With this disruption of healthcare, concern was raised  
96 about the deleterious effects on mortality and morbidity rates rising, specifically in these  
97 vulnerable children in such communities after the removal of lockdown measures [14].

98

99 Children hospitalised in specialist referral hospitals include complex cases requiring higher  
100 levels of medical care and support [15]. This study describes and analyses changes in admission  
101 and in-hospital mortality amongst children in South African specialist referral hospitals during  
102 all the levels of national lockdowns associated with the COVID-19 pandemic and the post-  
103 pandemic period.

104

## 105 **METHODS**

### 106 **Study design and population**

107 We conducted an interrupted time series analysis of routinely collected facility-level data of  
108 children below the age of 13 years hospitalised across all four of the largest public sector ( non-  
109 fee-paying) specialist referral hospitals in the city of Durban (eThekweni District), Kwa Zulu-  
110 Natal(KZN). The data collected included those hospitalised with medical diagnoses only, thus  
111 allowing analysis to reflect on the impact of the COVID-19 pandemic, specifically on  
112 communicable diseases. In-born neonates and children hospitalised for surgical ( general  
113 surgery, trauma, ear nose and throat procedures, orthopaedic reasons) or other non-medical  
114 reasons (psychiatric and social admissions for respite care or neglect) were purposefully  
115 excluded from the analysis.

116

117 We used data from the King Edward VIII, Mahatma Gandhi Memorial, Prince Mshyeni  
118 Memorial and R K Khan Memorial hospitals, which provide 240 in-patient paediatric medical  
119 specialist care beds (including designated high care and beds for interim invasive ventilation)  
120 for approximately 1,1 million children [15,16]. The children admitted to these hospitals are  
121 referred by primary healthcare providers (nurse-run day-clinics, family practitioners, non-  
122 specialist district hospitals) and are generally complex cases requiring higher care levels.  
123 Children who require longer-term invasive ventilation (>72 hours) are referred to paediatric

124 intensive care units located at the quaternary hospital .The majority of the children who attend  
125 and are hospitalised in these four referral hospitals are from lower socio-economic  
126 communities and live in communities with high population densities [15]. The HIV antenatal  
127 seroprevalence of the population served by these hospitals is high at 44·3%(CI;41·6-46·7),  
128 reflecting a high burden of both HIV-exposed infants and HIV-infected children [16,17].

129

130 The study period spanned 60 months and included 23 months in the pre-COVID-19 period (01  
131 April 2018 to 28 February 2020), 23 months of the designated COVID-19 period (01 March  
132 2020 to 31 January 2022), during which one of the five lockdown stages were promulgated and  
133 14 months post COVID-19 period (01 February 2022 to 31 January 2023), when no lockdowns  
134 were in place. South Africa announced a national lockdown on 23 March 2020, implemented  
135 on 27 March 2020 [18,19]. Starting at level 5, the lockdown was one of the most severe  
136 globally, with restrictions on movement and cancellation of public transport, although travel to  
137 receive healthcare was allowed [19]. The lockdown was eased to level 4 on May 1, 2020, when  
138 public transport was allowed, and to level 3 on 01 June 2020, which allowed some economic  
139 activity to resume. Over the 23-month COVID-19 period, lockdown levels vacillated  
140 depending on the authorities' anticipated need to prevent community transmission [18,19].  
141 Monthly data in the COVID period were thus stratified according to the predominant lockdown  
142 level in each of the 23 months in this period.

143

#### 144 **Data collection**

145 The admission diagnosis of children included in the facility-level monthly data was obtained  
146 from in-patient records that an attending paediatrician validated. Data on hospitalised children  
147 included children in all age groups below 13 years of age (SA's referral hospitals have a 13-  
148 year-old cut-off for paediatric care), those below one year of age (infant) and those between

149 one and five years of age. Data on hospitalised children under the age of five years with lower  
150 respiratory tract infections (LRTI) or acute gastroenteritis (AGE) as their main diagnosis were  
151 specifically tracked. In this study, the term LRTI as a diagnostic category includes patients  
152 with lobar or bronchopneumonia, bronchiolitis and bronchitis. This categorisation was based  
153 on a standardised nomenclature used by clinicians across all sampled hospitals in admission  
154 diagnoses and mortality classification. LRTI excludes upper respiratory tract infections (URTI)  
155 or upper airway obstruction, asthma or recurrent wheezing [20]. In addition, monthly admission  
156 numbers of children categorised as having severe acute malnutrition (SAM) using the WHO  
157 guidelines were also collected. In all four hospitals, the categorisation of a child under five  
158 years of age with SAM is verified by a paediatrician and then independently corroborated by  
159 an attending dietician within 72 hours post-admission. This dual verification for nutritional  
160 categorisation enables weights post-rehydration to be utilised and for lengths or heights to be  
161 rechecked for accuracy. In the WHO nutritional classification system, children are classified  
162 as either having severe acute malnutrition (SAM), moderate acute malnutrition (MAM), not  
163 acutely malnourished but considered at risk (NAM@risk), or not acutely malnourished (NAM)  
164 or as overweight or obese [21,22]. The SAM definition was based on weight-for-length z score  
165 and/or the presence of nutritional oedema as documented by an attending paediatrician [22].  
166 The mid-upper arm circumference (MUAC) scores were not used in this study as the  
167 documentation was inconsistent in the reviewed source documents[21,22]. The numbers of  
168 children who demised monthly in all age categories and specifically those with a diagnosis of  
169 LRTI, AGE or SAM under the age of five years were also collected.

170

#### 171 *Verification of data*

172 Four independent databases were utilised over the study periods.<sup>23</sup> These databases  
173 corroborated and validated information and ensured minimal missing data. Each hospital's

174 paediatric department has an in-hospital database used as the primary database. A specialist  
175 paediatrician in each hospital is responsible for verifying and entering all weekly admissions  
176 tallies and death information (categorised by age and diagnosis) from original case records into  
177 this primary database. Admission and mortality data is also verified monthly by paediatricians  
178 in the department from a standardised admission and deaths daily register and then submitted  
179 to a facility information officer, which feeds this data to a central district-wide district health  
180 information system database (DHIS) [23]. In this study, we validated the DHIS data obtained  
181 with source data in each hospital from the primary database that the attending paediatricians  
182 held to avoid inconsistencies. The third database was the Child Healthcare Problem  
183 Identification Programme (Child PIP). Paediatric departments across many SA hospitals utilise  
184 this database to record and systematically review child deaths independently, emphasising  
185 assessing modifiable factors related to these deaths[24]. Mortality figures per hospital were  
186 corroborated using the Child PIP and DHIS and verified at each hospital. The fourth database  
187 used verified nutritional categorisation of all in-hospital patients, and in-hospital dietitians  
188 maintained these databases in each hospital. The databases were rechecked and then verified  
189 with the hospital records for discrepancies.

190

## 191 **Data analysis and interpretation**

192 We used descriptive statistics to summarise data and present summaries of admission, mortality  
193 and case fatality rates before, during and after the COVID-19 period with lockdowns. We did  
194 an interrupted time series segmented regression analysis by fitting linear regression models  
195 with the outcome of monthly paediatric admissions. The models included dummy lockdown  
196 level variables indicating 1 or 0 for each level 1 (least severe) to 5 (most severe) of lockdown  
197 and a dummy variable for the post-COVID-19 period. COVID-19 waves could also have  
198 caused an increased burden on the healthcare system, which may have affected paediatric



199 healthcare use and admissions independently from lockdowns. We, therefore, modelled this by  
200 including a continuous variable for excess mortality in eThekweni for each month as a proxy  
201 for COVID-19-related burden on the healthcare system. To account for seasonal changes due  
202 to RSV and other respiratory virus outbreaks and Rotavirus and other viral causes of AGE, we  
203 included two pairs of sine and cosine terms (Fourier terms) in the models to account for  
204 seasonality. This approach takes account of pre-lockdown trends and allows estimation of the  
205 effect of each level of lockdown and whether there was a change in admissions during the  
206 period following the cessation of all lockdowns post-COVID. We built separate models by age  
207 (under one year, under five years and between 5 and 13 years) and diagnosis (LRTI, AGE and  
208 SAM). Age-specific changes thus do not sum to the total change because the total admissions  
209 (and deaths) were analysed as a separate time series. We checked for auto-correlation by  
210 calculating the auto-correlation and partial autocorrelation functions. We analysed data using  
211 R4.0 (R Foundation for Statistical Computing, Vienna, Austria; appendix).

212

## 213 **RESULTS**

214 During the 60-month study period that extended from 01 April 2018 to 31 March 2023, 45 015  
215 children were admitted across all four specialist hospitals in Durban (eThekweni district). Of  
216 these, 20 490 (45.5%) were <1 year of age (infants), 16 549 (36.8%) were children between  
217 one and below five years, and 7976 (17.7%) were children between five and below 13 years.  
218 Across all these age groups, 1237 children died in hospital during the 60 months of the study  
219 period, with 733 (59.3%) being infants, 346 (28%) between one and below five years and  
220 158 (12.7%) between five and 13 years. Table 1 compares unadjusted mean monthly admission  
221 and mortality numbers and raw case fatality rates during the three assessed periods. While the  
222 mean monthly admission appeared marginally lower in the COVID-19 period, there was less

223 of a decrease in mean monthly deaths. The case fatality rates for LRTI, AGE and SAM in the  
224 under-five-year group were higher during COVID-19.

225

226 **[Table 1 Unadjusted mean monthly admission and mortality numbers during all**  
227 **lockdown levels and post-COVID period]**

228

229 **Interrupted time series analysis**

230 **Adjusted admission and mortality monthly numbers by age group**

231 The analysis showed a significant decrease in total admissions for children under 1, 1-to-5-  
232 year-olds, and 5-13-year-olds. Level 5 lockdowns saw the most significant mean monthly  
233 decreases of 450(95% CI=-657.3--244.3)  $p<0.001$ , 213.2(-349--76.8)  $p=0.003$ , 376.4(-  
234 566.3--186.4)  $p<0.0001$  in total, under-1-year-old and 1-to-5-year-old admissions  
235 respectively. Level-1-lockdowns had the lowest mean monthly decreases. The trend was  
236 similar for school-going children (5-13-year olds) to all other age groups. There was also  
237 evidence of seasonality on a 6-month scale during the pre-and post-COVID periods in total  
238 admissions ( $p=0.002$ ), under-1-year-olds ( $p=0.034$ ) and 1-to-5-year olds ( $p=0.004$ ) which was  
239 not evident during the COVID-19 lockdown periods. In the segmented regression model, there  
240 was no evidence that excess monthly mortality in SA was associated with changes in admission  
241 numbers in any age group. Figures 1(a),1(b),1(c) and 1(d) illustrates these findings.

242

243 In the post-COVID-19 period, total admissions remained slightly lower than during the pre-  
244 COVID-19 period (decrease of 68, 95% CI=-134.2--2.4,  $p=0.0430$ ). This was mainly due to  
245 a decrease in the 1-5-age group (-60.9, 95% CI=-121.5--0.2,  $p=0.049$ ), with no evidence of a  
246 difference in the under-1-age group (+6.5, -50.1--37.0,  $p=0.765$ ), nor 5-13-year olds (-9.6, -  
247 26.8--7.7,  $p=0.270$ ).

248

249 The segmented regression analysis showed no significant change in monthly mortality in all  
250 ages nor specifically in the age categories of under-1-year-olds and 1-to-5-year-olds and 5-13-  
251 year age groups during any lockdown levels, nor the post-COVID period. (Table 2, Figure 2(a),  
252 2(b), and 2(c) provide the data and illustrate the trends, respectively)

253

254 **[Table 2, Changes in mean monthly admissions and mortality in lockdown levels 1 to 5 in**  
255 **all age groups]**

256 **[Figure 1 Interrupted time series analysis of admissions by age group, all ages 1(a), under**  
257 **12 months 1(b), under 60 months 1(c) and between 5 and 13 years old (1d).]**

258 **[Figure 2 Interrupted time series analysis of mortality rates by age group all ages 2(a),**  
259 **under 12 months2(b) and under 60 months 2(c).]**

260

261 **Admission and mortality rates for children with acute gastroenteritis (AGE), lower**  
262 **respiratory tract infections (LRTI)and severe acute malnutrition (SAM)**

263 Significant decreases in admissions were seen during most of the lockdown levels in the  
264 COVID-19 period in children hospitalised with AGE, LRTI or SAM (Table 3). Level 5  
265 lockdowns saw decreases of 82.8(95%, CI=156.3--9.3)  $p=0.028$ , 132.8(-238.6--  
266 27.0) $p=0.015$  and 25.7(95%, -47.4--3.9),  $p=0.022$  in AGE, LRTI and SAM cases. The terms  
267 for seasonality provided evidence of seasonal variation on both a 6-month ( $p=0.032$ ) and 12-  
268 month ( $p=0.003$ ) scale for AGE admissions, a 6-month scale for LRTI admissions ( $p=0.004$ )  
269 and a 12-month scale for SAM admissions ( $p<0.001$ ).

270

271 Figures 3(a), 3(b) and 3(c) illustrate these changes and loss of the seasonal patterns in AGE  
272 and LRTI seen during the COVID-19 period .

273

274 In the post-COVID period, there was no evidence that AGE, LRTI, or SAM admissions  
275 changed compared to pre-COVID numbers. Figures 3(a), 3(b) and 3(c) illustrate a return to  
276 seasonal patterns in the post-COVID period for cases of AGE and LRTI.

277

278 When analysing changes in mortality in those hospitalised with either AGE, LRTI or SAM, no  
279 significant changes were noted in all the lockdown levels. Table 3 and Figures 4(a), 4(b) and  
280 4(c) illustrates these findings.

281

282 **[Table 3 Changes in adjusted mean monthly admission and case mortality numbers in 1-**  
283 **5-year-old children with Acute Gastroenteritis and Lower Respiratory tract infections**  
284 **during all lockdown levels and post-Covid -period]**

285 **[Figure 3 Interrupted time series analysis of admissions by diagnosis in 1-5 year old with**  
286 **acute gastroenteritis 3(a), lower respiratory tract infections 3(b) and severe acute**  
287 **malnutrition 3(c).]**

288 **[Figure 4 Interrupted time series analysis of mortality rates per admission diagnosis in**  
289 **1-5 years-olds with acute gastroenteritis 4(a), lower respiratory tract infections 4(b) and**  
290 **severe acute malnutrition 4(c).]**

291

## 292 **DISCUSSION**

293 Our analysis shows that changes in patterns of admissions and mortality of vulnerable SA  
294 children following the COVID-19 pandemic does differ from experiences elsewhere in the  
295 world. Despite significant decreases in admissions and changes in seasonal patterns of  
296 communicable diseases during the COVID-19 lockdowns, there was neither a concomitant

297 decrease in in-hospital deaths nor was there an anticipated post-pandemic surge in admissions  
298 in children from communities with high levels of HIV, TB and poverty.

299

300 Several modelling studies and early reviews from LMICs have raised concerns about the  
301 impact of the COVID-19 pandemic on vulnerable populations, especially those where fragile  
302 healthcare systems exacerbate delayed access to care[10,25]. In our study reflecting sick  
303 children requiring hospital admission and drawn from low-income communities ,a high  
304 population density and existing infectious burden admission numbers did decrease , as was  
305 documented in high-income countries, following the promulgation of stringent lockdowns  
306 [5,13,15,26]. These decreases in admissions at referral hospitals mirrored decreases in  
307 admissions and visits to primary health clinics [4]. Of concern, however, is that the  
308 documented decrease in primary care visits and referral hospital admissions could reflect  
309 decreased access to healthcare for sick children. Whilst lockdown laws permitted the seeking  
310 of healthcare and all facilities remained open through the COVID-19 pandemic, the significant  
311 decreases in the admission of sick children, raises the likelihood of worsening of access to  
312 health care amongst vulnerable populations .In addition to concerns with decreased access to  
313 health care these findings may reflect the influence of a decreased transmission of common  
314 childhood communicable diseases, possibly affected by decreased social interactions and  
315 mitigating strategies to prevent COVID-19 transmission [9,10]. It has been postulated that  
316 increased preventative hygiene habits adopted during the COVID-19 period, like masking,  
317 regular hand washing, creche and school closures, and other restrictions impacting person-to-  
318 person spread of infections, resulted in modified seasonal patterns of communicable diseases  
319 like Rotavirus associated AGE and Respiratory syncytial Virus associated LRTI[6,8,27]. The  
320 impact of this possible outcome however has not been fully understood in vulnerable child  
321 populations including those with high population densities.

322 In this study, that reflects children admitted at referral hospitals, including those with complex  
323 problems and diagnoses, mortality numbers in all age groups and children with AGE, LRTI  
324 and SAM did not decrease during the lockdown period, unlike previously reported [10]. Our  
325 finding of a persistence of high mortality despite significant decreases in admissions in the  
326 COVID-19 period has been documented elsewhere in poor socio-economic communities [3].  
327 Concerns that this reflects an overall increase in child mortality is not borne out however by  
328 any significant increase in excess childhood mortality as seen in age-specific annualised excess  
329 death rates (per 1000 population) documented over this period [28].

330

331 We postulate that in our large cohort of children hospitalised in public sector referral hospitals  
332 there are many children especially those living within high population densities that continued  
333 to have exposure to many childhood infections and continued to have a delayed access to care  
334 for a multiplicity of reasons. This latter group has been previously documented as experiencing  
335 delays in accessing standard healthcare despite the availability of free public health  
336 services[29]. Many caregivers here are noted to utilise multiple other sources of care, including  
337 allopathic, indigenous and home treatments prior to presenting at public services often with  
338 severe complication or in severe distress [29]. It is possible that caregivers in this sub-group  
339 would have persisted with late presentation for acute care, similar to pre-pandemic behaviours  
340 or delayed their access to hospital care even later. Further exploration is thus required to  
341 determine how this vulnerable group were uniquely affected by the challenges posed both by  
342 the COVID-19 pandemic and the associated lockdowns.

343

344 Our study also documents that the expected surge in malnutrition cases during the lockdown  
345 period did not occur, unlike those reported in other studies from developing countries[10,30].  
346 The persistence of high mortality rates in SAM similar to pre-pandemic levels cases despite

347 the decreased admission also suggests that sick children did get to healthcare; however, they  
348 could have done so later than was previously the case [28].

349

350 The great concern expressed across the world following the decreased utilisation of  
351 preventative services and, specifically for vulnerable populations where TB and HIV are  
352 endemic, was an expected post-pandemic surge[11,25]. With the disruption of seasonal  
353 patterns of viral bronchiolitis, an expected surge in LRTI was also anticipated and documented  
354 across countries with severe lockdown [31,32]. In this study, which analysed data over a longer  
355 post-pandemic period than most other studies, we do not show this anticipated surge in  
356 admissions in under-1-year and 1-to-5-year-old children as well as in cases of AGE, LRTI and  
357 SAM. The trend identified in the post-pandemic period may reflect a gradual increase in  
358 admissions back to pre-COVID levels. Our postulates is that these vulnerable children living  
359 high population densities with cramped living, were exposed to common childhood infections  
360 unlike these children living in low populations densities the lack of a post-pandemic surge  
361 seen with most of the children in this cohort could be explained by this possibility.

362

363 Strengths of our study include the large cohort of children hospitalised specifically for medical  
364 diagnoses in public sector referral hospitals. We reflected on acutely sick and vulnerable  
365 children susceptible to communicable diseases. Our use of long-term routine data considers  
366 pre-COVID, all the COVID lockdown levels, and substantial post-COVID periods, whilst most  
367 studies have largely focused on the COVID-19 period. However we were not able to verify  
368 definitive microbiological, virologic and formal HIV and TB results; instead, we relied on  
369 retrospective diagnoses provided by source documents and by paediatricians on site. Further  
370 studies specifically targeting these populations with verifiable microbiological testing may be  
371 required to unpack children's behaviours under differing contexts. This study may help

372 determine the epidemiological patterns of vulnerable children when faced with communicable  
373 disease outbreaks in greater detail. We did not focus on neonatal or non-medical or children  
374 admitted to referral intensive care units (ICU) requiring prolonged ventilation. We could not  
375 assess the definitive socio-economic status and inferred this based on previous usage patterns  
376 in public sector hospitals. The retrospective data reflects in-hospital mortality specifically and  
377 does not include community-based death data.

378

379 In conclusion, our findings suggest that, in one of the regions most affected by HIV,  
380 Tuberculosis and malnutrition whilst admissions of acutely sick children decreased similar to  
381 other countries with better health resources, a decrease in in-hospital mortality and anticipated  
382 post-pandemic surges in admission was not seen as compared with these countries . This study  
383 provides evidence that children, in vulnerable communities with high population densities ,  
384 HIV and TB infection rates, behaved differently to communities where these conditions were  
385 not as common . These findings suggest that mitigating strategies to reduce infectious disease  
386 outbreaks possibly affected transmission dynamics of common communicable childhood  
387 diseases, differently in communities and this requires further exploration and study. Further  
388 studies in vulnerable populations are needed to identify persisting challenges in healthcare  
389 provision , infection transmission dynamics and the impact of promulgation of uniform  
390 pandemic control measures on child health outcomes .

391

## 392 **DECLARATIONS**

### 393 **Acknowledgements**

394 The authors would like to express their gratitude to Mrs Leora Sewnarain's assistance with  
395 formatting and language review.

### 396 **Funding**



397 There was no funding for this study.

#### 398 **Availability of data and materials**

399 The data used for this analysis cannot be shared publicly because of legal and ethical  
400 requirements regarding using routinely collected clinical data in South Africa. Researchers may  
401 request access to the data from the eThekweni Municipality Health Unit and Kwa-Zulu Natal  
402 Department of Health (contact details obtainable upon request to the corresponding author).

#### 403 **Authors' contributions**

404 KLN, JD and MA conceptualised the study. KLN, KC, ML and YN oversaw data collection.  
405 KLN, KC, ML and YN oversaw the curation of the data. JD, CB and KLN analysed the data.  
406 KLN drafted the manuscript. JD, CB and KLN verified the underlying data. All authors  
407 critically reviewed and edited the manuscript and consented to final publication. KLN and JD  
408 had full access to all the data, and all authors had final responsibility for the decision to submit  
409 for publication.

#### 410 **Disclaimer**

411 The views and opinions expressed in this article are those of the authors and do not necessarily  
412 reflect the official policy or position of any affiliated agency of the authors.

#### 413 **Ethical consideration**

414 Adherence to ethical guidelines was ensured throughout the research process. The study was  
415 approved by the University of KwaZulu-Natal Biomedical Research Ethics Committee  
416 (BREC/00002981/2021), the KwaZulu-Natal Department of Health's Provincial Health  
417 Research Ethics Committee, eThekweni District Health Department and the Child Health  
418 Identification Programme (National committee) with a waiver for informed consent for  
419 analysis of anonymised, routinely collected data.

#### 420 **Consent for publication**

421 Not applicable.

422 **Competing interests**

423 The author(s) declare that they have no financial or personal relationship(s) that may have  
424 inappropriately influenced them in writing this article.

425

426 **REFERENCES**

427 1. Haider N, Osman AY, Gadzekpo A, Akipede GO, Asogun D, Ansumana R, et al.  
428 Lockdown measures in response to COVID-19 in nine sub-Saharan African countries. *BMJ*  
429 *Global Health* 2020; **5**: e003319. doi: 10.1136/bmjgh-2020-003319.

430 2. Jensen C, Yannigan Y, Mafanya N, Majozi N, Martin T, Mnguni T, et al. Patterns of disease  
431 on admission to children's wards and changes during a COVID-19 outbreak in KwaZulu-  
432 Natal Province, South Africa. *S Afr Med J*. 2022;**112**(4):279–287.

433 3. Chiabi A, Forgwei MN, Bissong M, Niba L, Abah JN, Nsame D. Trends in Pediatric  
434 Admissions and Mortality during the COVID-19 Pandemic in an Urban Setting in  
435 Cameroon. *J Trop Pediatr*. 2022; **68**(3):fmac026. doi: 10.1093/tropej/fmac026.

436 4. Jensen, C., & McKerrow, N. (2020). Child health services during a COVID-19 outbreak in  
437 KwaZulu-Natal Province, South Africa. *S Afr Med J*, **111**(2), 114–119.  
438 doi:10.7196/SAMJ.2021.v111i2.15243.

439 <http://www.samj.org.za/index.php/samj/article/view/13185>

440 5. Kruizinga MD, Peeters D, van Veen M, van Houten M, Wieringa J, Noordzij JG, et al. The  
441 impact of lockdown on pediatric ED visits and hospital admissions during the COVID-19  
442 pandemic: a multicenter analysis and review of the literature. *Eur J Pediatr*. 2021;  
443 **180**(7):2271–2279. doi: 10.1007/s00431-021-04015-0.

444 6. Van Brusselen D, De Troeyer K, Ter Haar E, Vander Auwera A, Poschet K, Van Nuijs S,  
445 et al. Bronchiolitis in COVID-19 times: a nearly absent disease? *Eur J Pediatr*.  
446 2021;**180**(6):1969–1973. doi: 10.1007/s00431-021-03968-6.

- 447 7. Coma E, Méndez-Boo L, Mora N, Guiriguat C, Benítez M, Fina F, et al. Divergences on  
448 expected pneumonia cases during the COVID-19 epidemic in Catalonia: a time-series  
449 analysis of primary care electronic health records covering about 6 million people. *BMC*  
450 *Infect Dis.* 2021;**21**(1):283. doi: 10.1186/s12879-021-05985-0.
- 451 8. Curatola A, Lazzareschi I, Bersani G, Covino M, Gatto A, Chiaretti A. Impact of COVID-  
452 19 outbreak in acute bronchiolitis: Lesson from a tertiary Italian Emergency Department.  
453 *Pediatr Pulmonol.* 2021;**56**(8):2484–2488. doi: 10.1002/ppul.25442.
- 454 9. Dorward J, Khubone T, Gate K, Ngobese H, Sookrajh Y, Mkhize S, et al. The impact of  
455 the COVID-19 lockdown on HIV care in 65 South African primary care clinics: an  
456 interrupted time series analysis. *Lancet HIV.* 2021;**8**(3):e15–e165. doi: 10.1016/S2352-  
457 3018(20)30359-3.
- 458 10. McIntosh A, Bachmann M, Siedner MJ, Gareta D, Seeley J, Herbst K. Effect of COVID-  
459 19 lockdown on hospital admissions and mortality in rural KwaZulu-Natal, South Africa:  
460 interrupted time series analysis. *BMJ Open.* 2021;**11**(3):e047961. doi: 10.1136/bmjopen-  
461 2020-047961.
- 462 11. Nachega JB, Kapata N, Sam-Agudu NA, Decloedt EH, Katoto PDMC, Nagu T, et al.  
463 Minimising the impact of the triple burden of COVID-19, tuberculosis and HIV on health  
464 services in sub-Saharan Africa. *Int J Infect Dis.* 2021;**113**(Suppl 1):S16–S21. doi:  
465 10.1016/j.ijid.2021.03.038.
- 466 12. Mathamo A, Naidoo KL, Dorward J, Archary T, Bottomley C, Archary M. COVID-19 and  
467 HIV viral load suppression in children and adolescents in Durban, South Africa. *South Afr*  
468 *J HIV Med.* 2022;**23**(1):1424. doi:10.4102/sajhivmed.v23i1.1424
- 469 13. Govender K, Cowden RG, Nyamaruze P, Armstrong RM, Hatane L. Beyond the Disease:  
470 Contextualised Implications of the COVID-19 Pandemic for Children and Young People

- 471 Living in Eastern and Southern Africa. *Front Public Health*. 2020;**8**:504. doi:  
472 10.3389/fpubh.2020.00504.
- 473 14. Nachega JB, Grimwood A, Mahomed H, Fatti G, Preiser W, Kallay O, et al. From Easing  
474 Lockdowns to Scaling Up Community-based Coronavirus Disease 2019 Screening,  
475 Testing, and Contact Tracing in Africa-Shared Approaches, Innovations, and Challenges  
476 to Minimise Morbidity and Mortality. *Clin Infect Dis*. 2021;**72**(2):327–331. doi:  
477 10.1093/cid/ciaa695.
- 478 15. Massyn N, Barron P, Day C, Ndlovu N, Padarath A, editors. District Health Barometer  
479 2018/19. Durban: Health Systems Trust, February 2020.  
480 [https://www.hst.org.za/publications/District%20Health%20Barometers/District+Health+](https://www.hst.org.za/publications/District%20Health%20Barometers/District+Health+Barometer+2018-19+Web.pdf)  
481 [Barometer+2018-19+Web.pdf](https://www.hst.org.za/publications/District%20Health%20Barometers/District+Health+Barometer+2018-19+Web.pdf)
- 482 16. Hoque M, Hoque ME, van Hal G, Buckus S. Prevalence, incidence and seroconversion of  
483 HIV and Syphilis infections among pregnant women of South Africa. *S Afr J Infect Dis*.  
484 2021;**36**(1):296. doi: 10.4102/sajid.v36i1.296.
- 485 17. Human Sciences Research Council. South African National HIV Prevalence, Incidence,  
486 Behaviour and Communication Survey, 2017.  
487 <http://www.hsrc.ac.za/uploads/pageContent/10779/SABSSM%20V.pdf>
- 488 18. Republic of South Africa. Government Gazette Vol. 451 Cape Town, 15 January 2003, No.  
489 24252. No. 57 of 2002: Disaster Management Act, 2002.  
490 [https://www.cogta.gov.za/cgta\\_2016/wp-content/uploads/2016/06/DISASTER-](https://www.cogta.gov.za/cgta_2016/wp-content/uploads/2016/06/DISASTER-MANAGEMENT-ACT.pdf)  
491 [MANAGEMENT-ACT.pdf](https://www.cogta.gov.za/cgta_2016/wp-content/uploads/2016/06/DISASTER-MANAGEMENT-ACT.pdf)
- 492 19. Republic of South Africa. COVID-19 / Novel Coronavirus – Regulations and Guidelines -  
493 Coronavirus COVID-19. [https://www.gov.za/covid-19/resources/regulations-and-](https://www.gov.za/covid-19/resources/regulations-and-guidelines-coronavirus-covid-19)  
494 [guidelines-coronavirus-covid-19](https://www.gov.za/covid-19/resources/regulations-and-guidelines-coronavirus-covid-19)

- 495 20. Bamford LJ, Barron P, Kauchali S, Dlamini NR. In-patient case fatality rates improvements  
496 in children under five: diarrhoeal disease, pneumonia and severe acute malnutrition. *S Afr*  
497 *Med J*. 2018;**108** (3 Suppl 1):S33–S37. doi:10.7196/SAMJ.2018.v108i3.12772
- 498 21. World Health Organization (WHO)/United Nations Children’s Fund (UNICEF). WHO  
499 Growth Standards and the Identification of Severe Acute Malnutrition in Infants and  
500 Children, 2009.  
501 [https://iris.who.int/bitstream/handle/10665/44129/9789241598163\\_eng.pdf?sequence=1](https://iris.who.int/bitstream/handle/10665/44129/9789241598163_eng.pdf?sequence=1)
- 502 22. KZN Department of Health. KZN Guidelines on the Integrated Management of Acute  
503 Malnutrition (IMAM), January 2014. [http://www.kznhealth.gov.za/family/mcwh/kzn-](http://www.kznhealth.gov.za/family/mcwh/kzn-imam-guidelines.pdf)  
504 [imam-guidelines.pdf](http://www.kznhealth.gov.za/family/mcwh/kzn-imam-guidelines.pdf).
- 505 23. Bamford LJ, McKerrow NH, Barron P, Aung Y. Child mortality in South Africa: Fewer  
506 deaths, but better data are needed. *S Afr Med J*. 2018;**108**(3 Suppl 1):S25–S32. doi:  
507 10.7196/SAMJ.2017.v108i3b.12779.
- 508 24. Stephen CR. Saving Children 2012 - 2013: An Eighth Survey of Child Healthcare in South  
509 Africa. Pretoria: Tshepesa Press, 2016.  
510 [https://www.up.ac.za/media/shared/717/Child%20PIP/Saving%20children%20reports/sav-](https://www.up.ac.za/media/shared/717/Child%20PIP/Saving%20children%20reports/saving-children-2012-2013.zp207156.pdf)  
511 [ing-children-2012-2013.zp207156.pdf](https://www.up.ac.za/media/shared/717/Child%20PIP/Saving%20children%20reports/saving-children-2012-2013.zp207156.pdf)
- 512 25. Robertson T, Carter ED, Chou VB, Stegmuller AR, Jackson BD, Tam Y, Sawadogo-Lewis  
513 T, Walker N. Early estimates of the indirect effects of the COVID-19 pandemic on maternal  
514 and child mortality in low-income and middle-income countries: a modelling study. *Lancet*  
515 *Glob Health*. 2020 Jul;**8**(7):e901-e908. doi: 10.1016/S2214-109X(20)30229-1. Epub 2020  
516 May 12. PMID: 32405459; PMCID: PMC7217645.
- 517 26. Hu N, Nassar N, Shrapnel J, Perkes I, Hodgins M, O’Leary F, et al. The impact of the  
518 COVID-19 pandemic on paediatric health service use within one year after the first

- 519 pandemic outbreak in New South Wales, Australia - a time series analysis. *Lancet Reg*  
520 *Health West Pac.* 2022;**19**:100311. doi:10.1016/j.lanwpc.2021.100311.
- 521 27. Williams TC, MacRae C, Swann OV, Haseeb H, Cunningham S, Davies P, et al. Indirect  
522 effects of the COVID-19 pandemic on paediatric healthcare use and severe disease: a  
523 retrospective national cohort study. *Arch Dis Child.* 2021;**106**(9):911–917. doi:  
524 10.1136/archdischild-2020-321008.
- 525 28. Bradshaw D, Dorrington R, Laubscher R, Groenewald P, Moultrie T. COVID-19 and all-  
526 cause mortality in South Africa – the hidden deaths in the first four waves. *S. Afr. J. Sci.*  
527 2022;**118**(5/6). doi: 10.17159/sajs.2022/13300.
- 528 29. Sharkey AB, Chopra M, Jackson D, Winch PJ, Minkovitz CS. Pathways of care-seeking  
529 during fatal infant illnesses in under-resourced South African settings. *Trans R Soc Trop*  
530 *Med Hyg.* 2012;**106**(2):110–116. doi: 10.1016/j.trstmh.2011.10.008.
- 531 30. Sayedy S. Impact of COVID-19 on the Severe Acute Malnutrition Admissions Among  
532 Children 1-5 Years of Age Seeking Nutrition Services in Afghanistan, 2021. (Masters  
533 Thesis, University of Arkansas) <https://scholarworks.uark.edu/etd/4175>
- 534 31. Bardsley M, Morbey RA, Hughes HE, Beck CR, Watson CH, Zhao H, et al. Epidemiology  
535 of respiratory syncytial virus in children younger than 5 years in England during the  
536 COVID-19 pandemic, measured by laboratory, clinical, and syndromic surveillance: a  
537 retrospective observational study. *Lancet Infect Dis.* 2023;**23**(1):56–66. doi:  
538 10.1016/S1473-3099(22)00525-4.
- 539 32. Parums, Dinah. (2023). Editorial: Outbreaks of Post-Pandemic Childhood Pneumonia and  
540 the Re-Emergence of Endemic Respiratory Infections. *Medical science monitor : international medical journal of experimental and clinical research.* 29. e943312.  
541 10.12659/MSM.943312.  
542  
543

Fig 1a. Total admissions

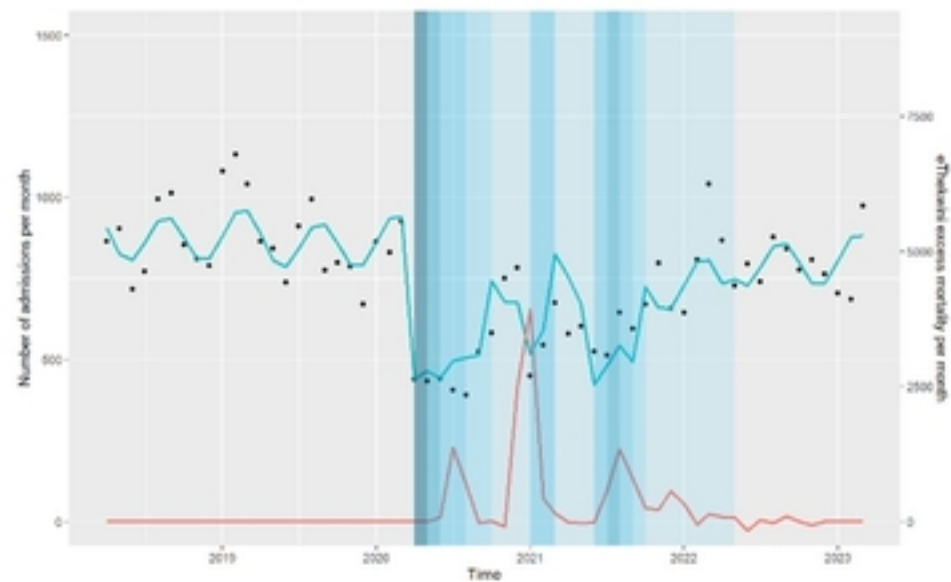

Fig 1b. Under 1 admissions

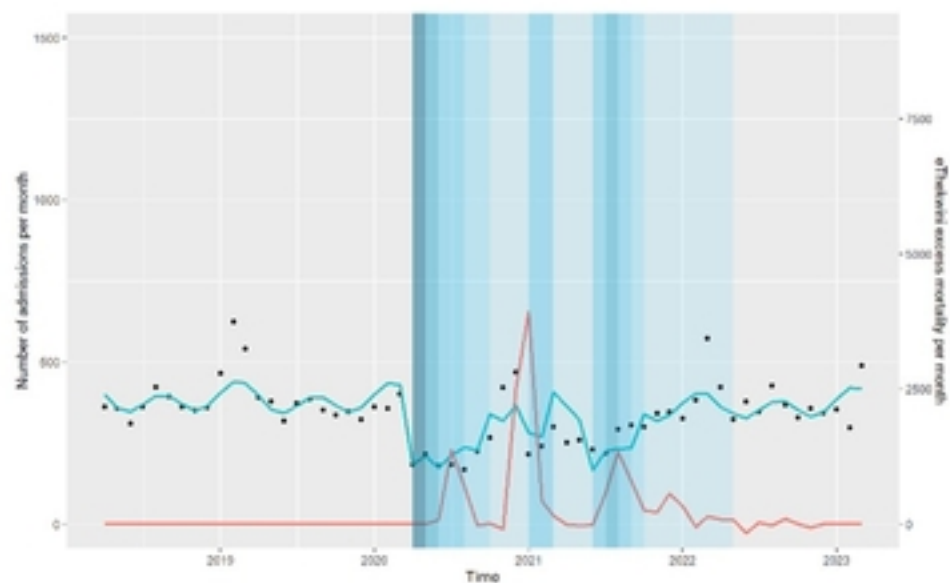

Fig 1c. Under 5 admissions

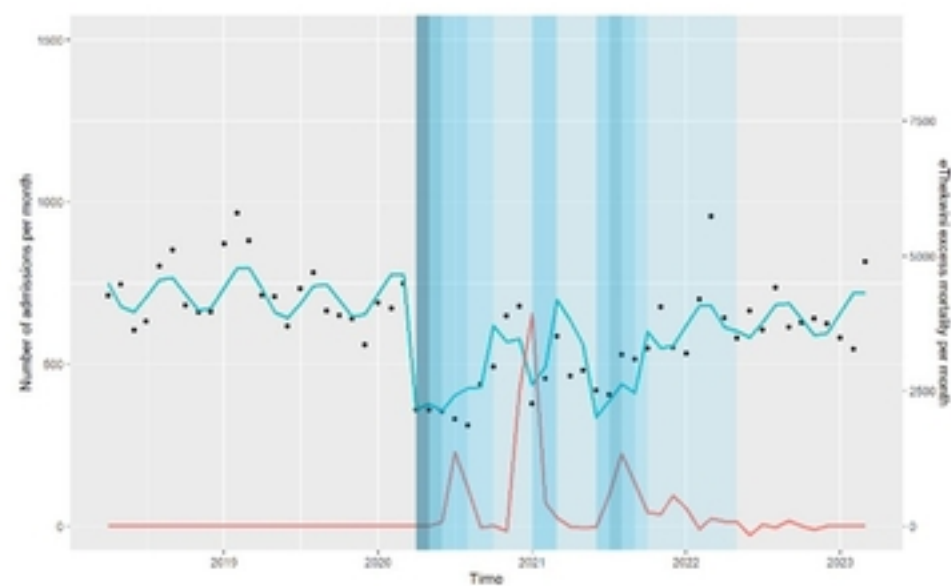

Fig 1d. 5-13 year old admissions

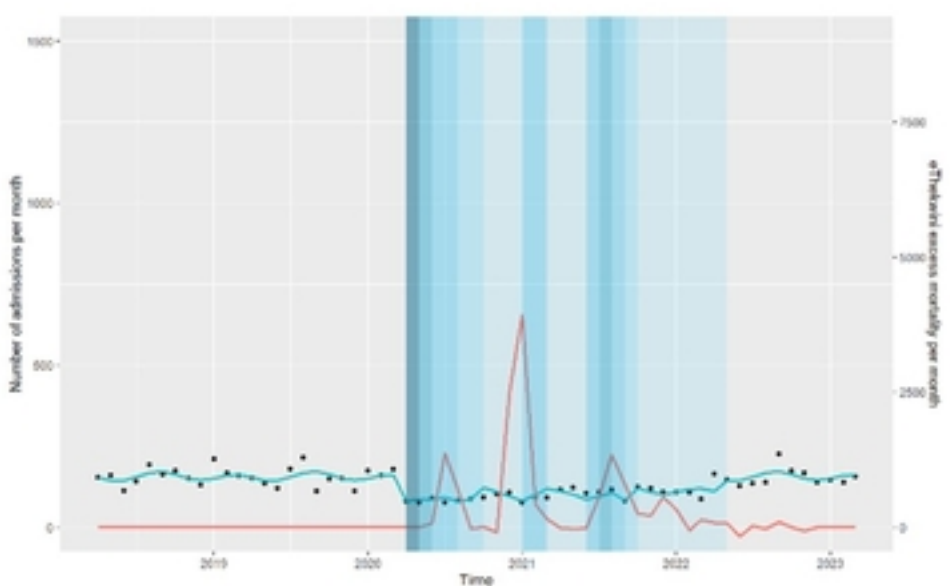

- Level 1 lockdown
- Level 2 lockdown
- Level 3 lockdown
- Level 4 lockdown
- Level 5 lockdown

- Excess mortality
- Modeled number of admissions

Figure 1

Fig 2a. Total deaths

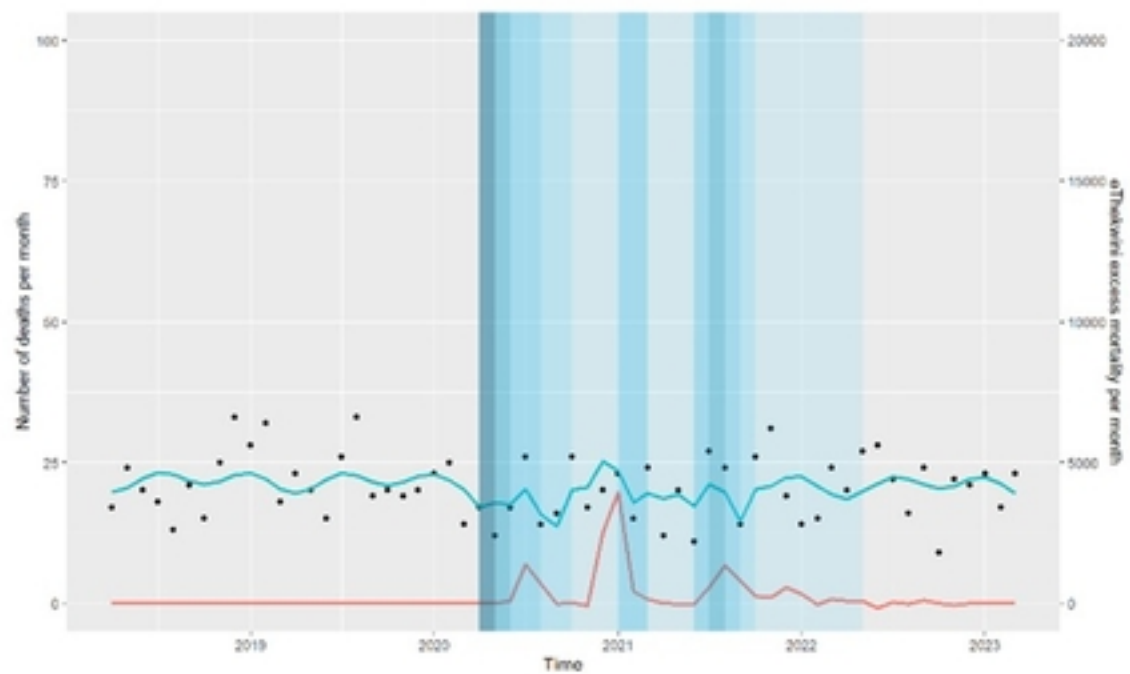

Fig 2b. Under 1 deaths

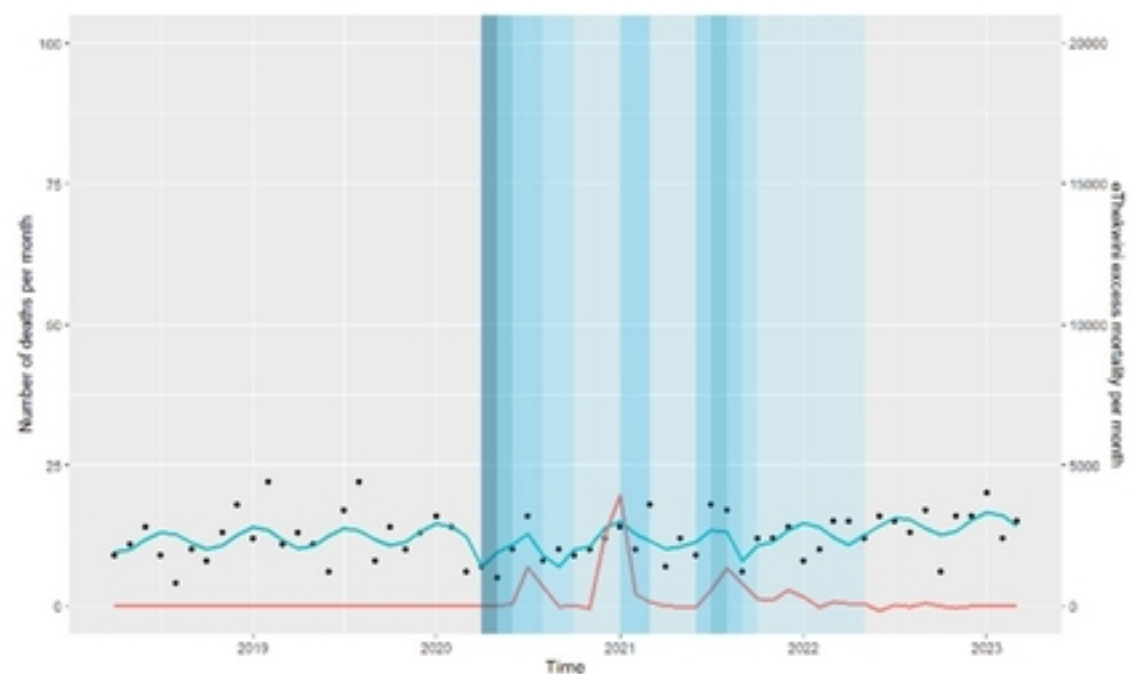

Fig 2c. Under 5 deaths

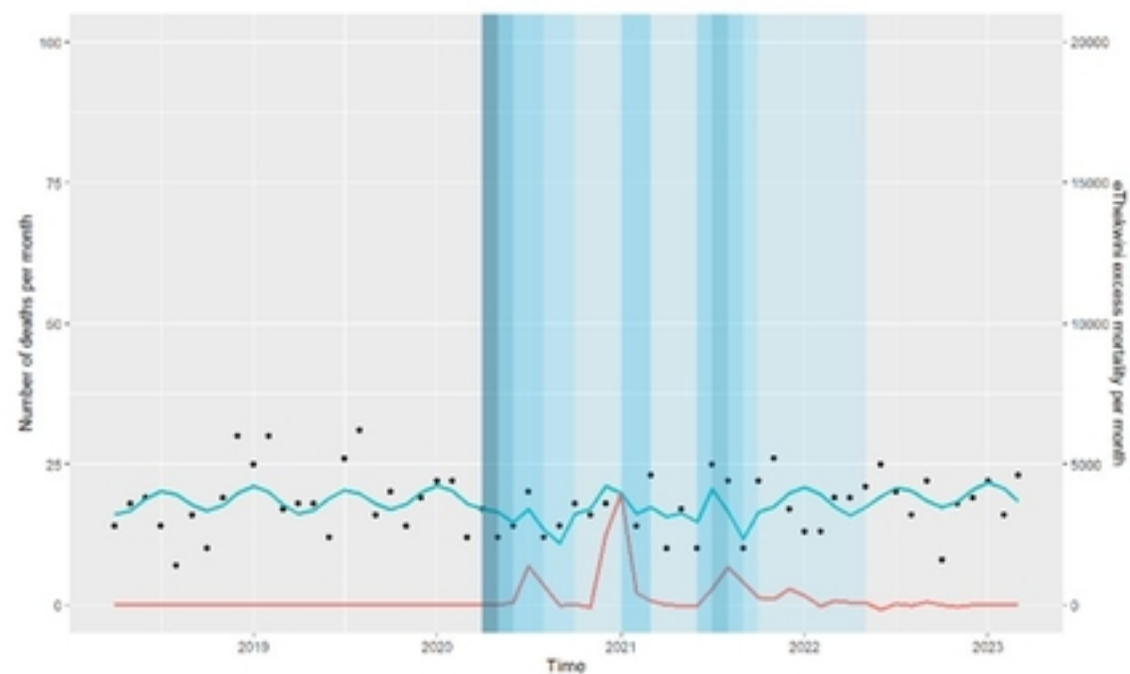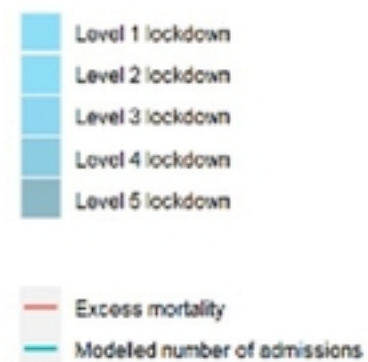

Figure 2



Fig 3a. Under 5 GE admissions

Fig 3b. Under 5 LRTI admissions

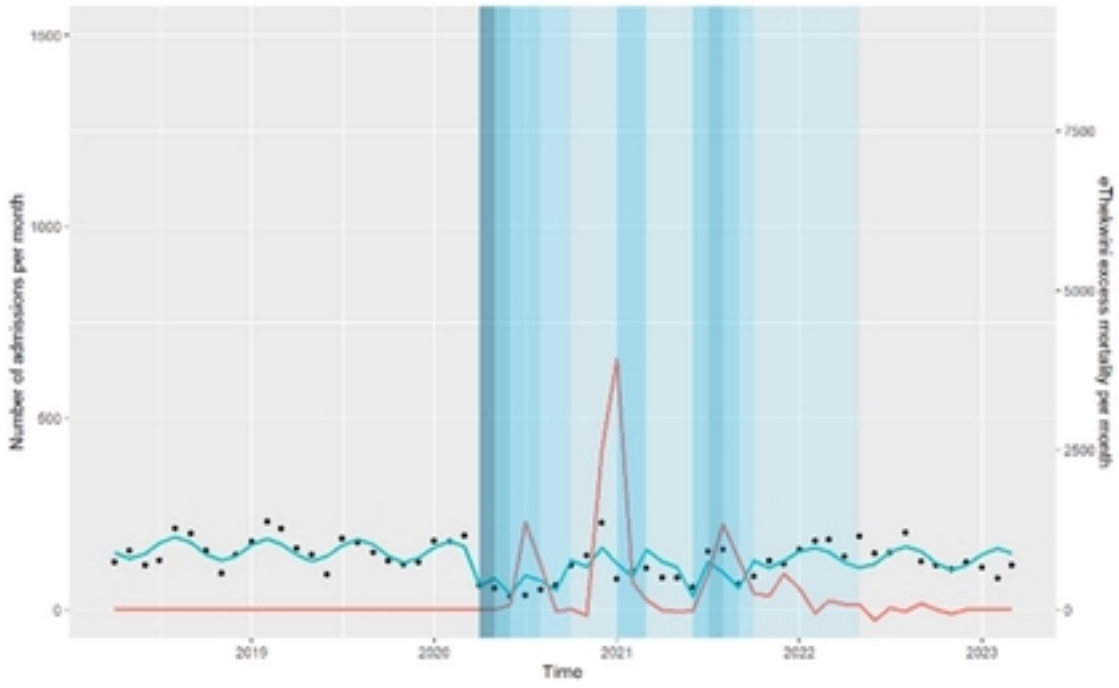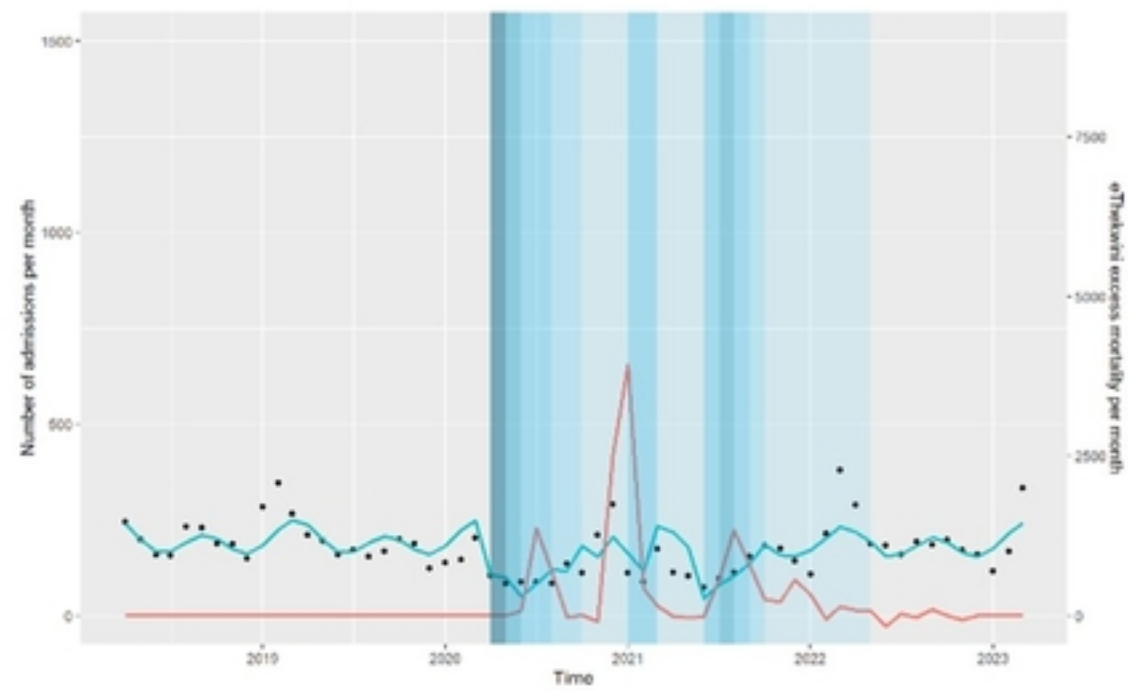

Fig 3c. Under 5 SAM admissions

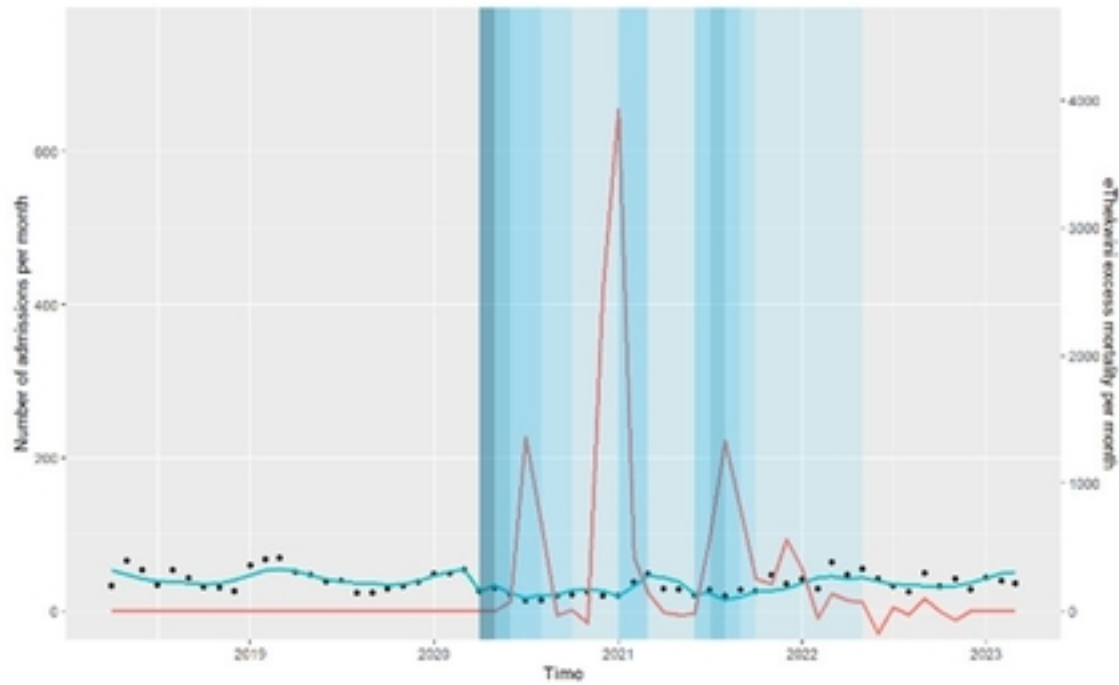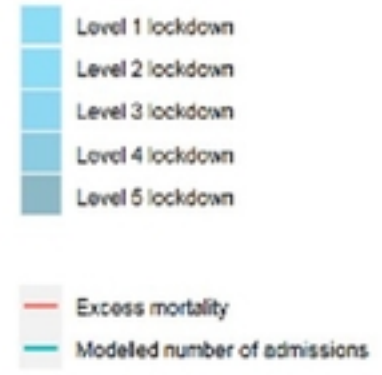

Figure 3

Fig 4a. Under 5 GE deaths

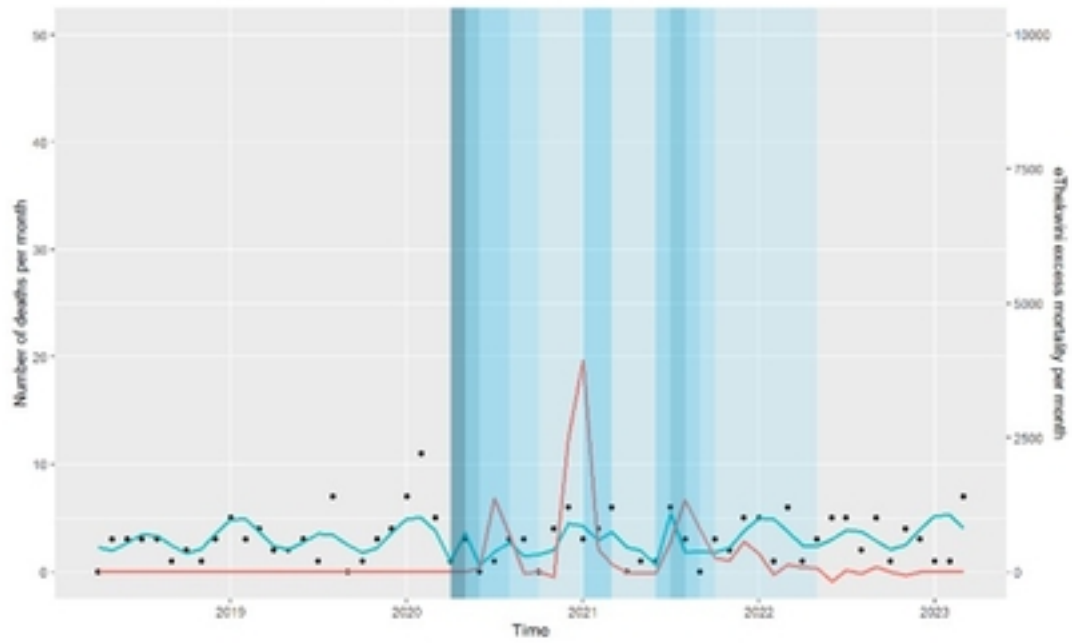

Fig 4b. Under 5 LRTI deaths

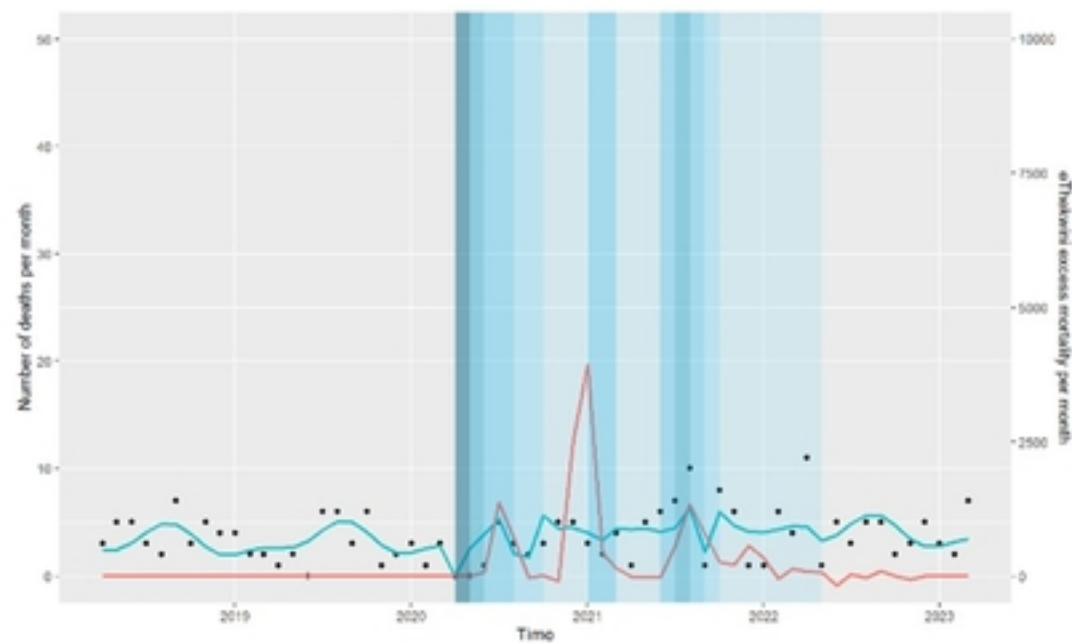

Fig 4c. Under 5 SAM deaths

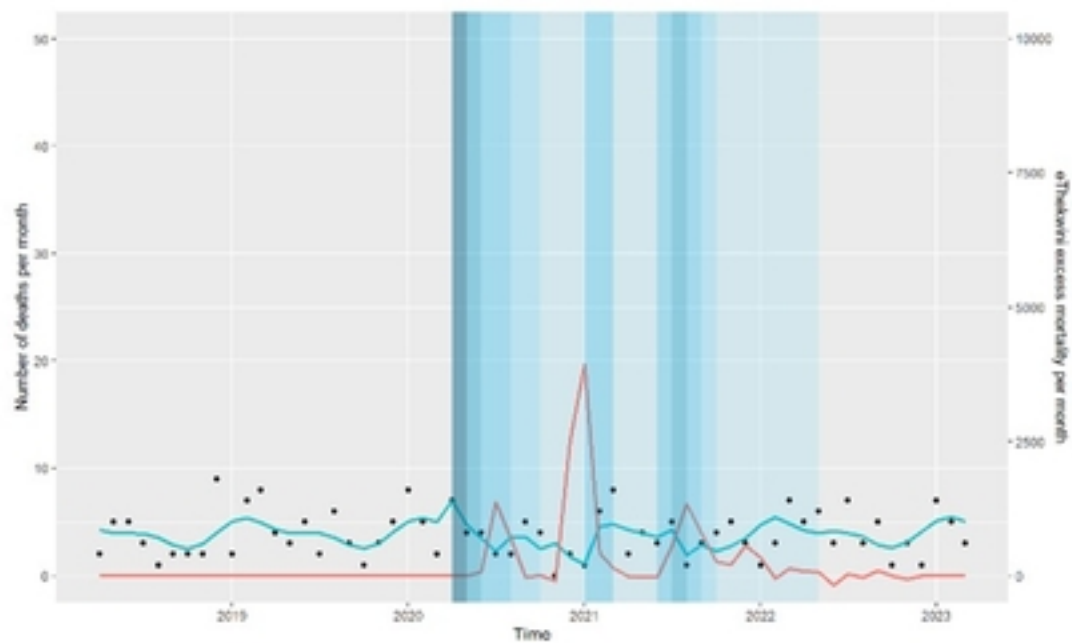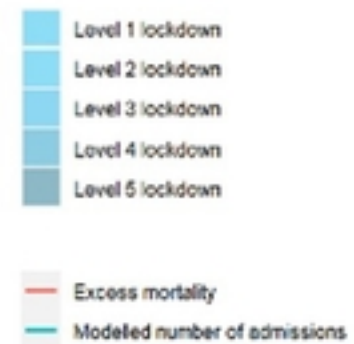

Figure 4
